# Supplementary material for: Characteristics of the retinal microvasculature in association with cardiovascular risk markers in children with overweight, obesity and morbid obesity
Source: PubMed Central journal article supplement (PMC6240121; doi:10.1038/s41598-018-35279-6), 2018-11-16
Supplement: 41598_2018_35279_MOESM1_ESM.pdf [file 41598_2018_35279_MOESM1_ESM.pdf]

**Characteristics of the retinal microvasculature in association with cardiovascular risk markers  
in children with overweight, obesity and morbid obesity**

Jesse Rijks<sup>a,b</sup>; Anita Vreugdenhil<sup>a,b\*</sup>; Elke Dorenbos<sup>a,b</sup>; Kylie Karnebeek<sup>a,b</sup>; Peter Joris<sup>b,d</sup>;

Tos Berendschot<sup>c</sup>; Ronald Mensink<sup>b,d</sup>; Jogchum Plat<sup>b,d</sup>

*a. Centre for Overweight Adolescent and Children's Healthcare (COACH), Department of Paediatrics, Maastricht University Medical Centre, Maastricht, The Netherlands*

*b. School of Nutrition and Translational Research in Metabolism (NUTRIM), Maastricht University, Maastricht, The Netherlands*

*c. University Eye Clinic Maastricht, Maastricht University Medical Centre, The Netherlands.*

*d. Department of Human Biology, Maastricht University, Maastricht, The Netherlands*

## Supplementary Information

## Supplementary Figure 1. Central retinal arteriolar equivalent stratified for anthropometric characteristic quartiles and cardiovascular risk parameter quartiles with a significant p for trend

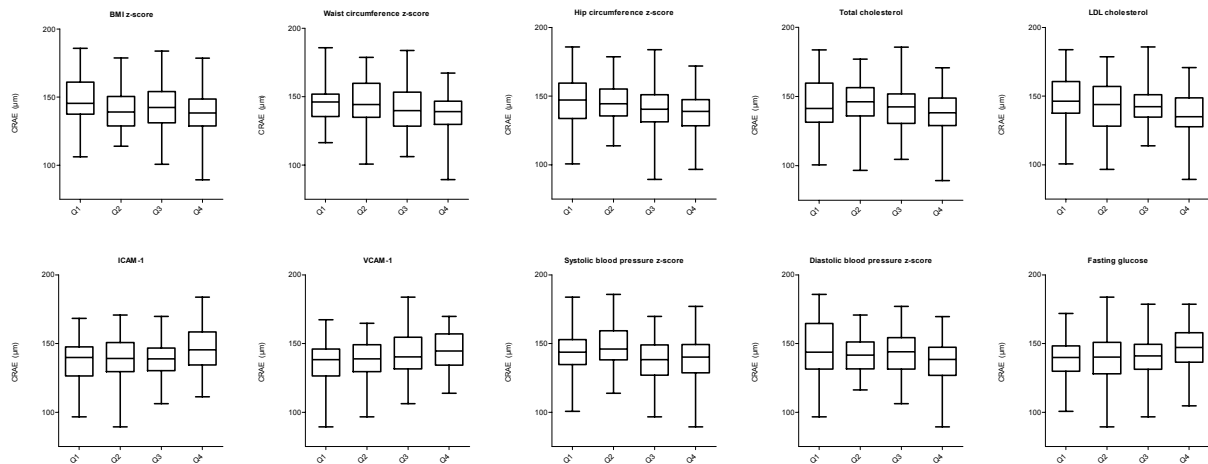

Data presented as mean with minimum and maximum. *P* for trends: BMI z score  $p=0.008$ ; waist circumference z score  $p=0.006$ ; hip circumference z score  $p=0.009$ ; serum total cholesterol concentrations  $p=0.038$ ; serum LDL cholesterol concentrations  $p=0.001$ ; serum ICAM-1 concentrations  $p=0.031$ ; serum VCAM-1 concentrations  $p=0.003$ ; systolic blood pressure z score  $p=0.009$ ; diastolic blood pressure z score  $p=0.005$ ; plasma glucose concentrations  $p=0.054$ . CRAE = central retinal arteriolar equivalent; ICAM-1= intracellular adhesion molecule 1; VCAM-1=vascular cell adhesion molecule 1

**Supplementary Figure 2. Central retinal venular equivalent stratified for cardiovascular risk parameter quartiles with a significant p for trend**

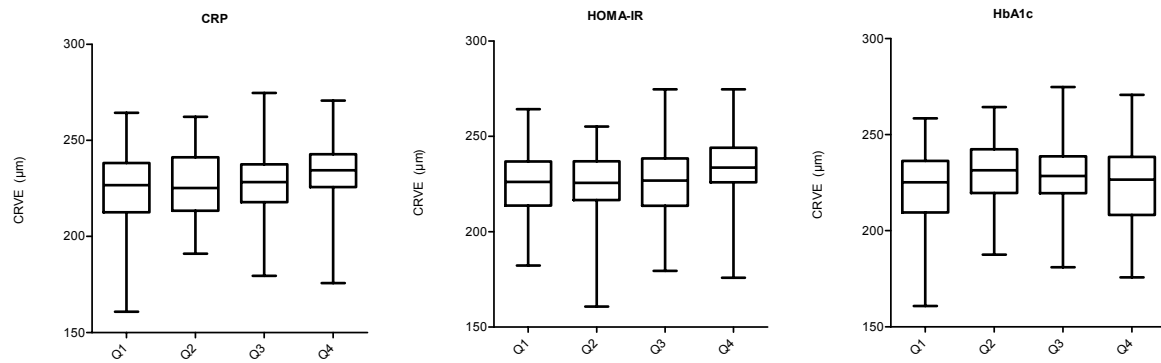

Data presented as mean with minimum and maximum. P for trends: serum CRP concentrations  $p=0.049$ ; HOMA-IR  $p=0.040$ ; serum HbA1c concentrations  $p=0.031$ . CRVE=central retinal venular equivalent; HOMA-IR = Homeostatic Model Assessment of Insulin Resistance;
